# Supplementary material for: Fabrication of Ag/CPs composite material, an effective strategy to improve the photocatalytic performance of coordination polymers under visible irradiation
Source: Royal Society of Chemistry journal article supplement (doi:10.1039/c3dt51178b), 2013-01-01
Supplement: c3dt51178b.pdf [file c3dt51178b.pdf]

## **Electronic Supplementary Information (ESI)**

### **Fabrication of Ag/CPs Composite Material, an Effective Strategy to Improve the Photocatalytic Performance of Coordination Polymer under Visible Irradiation**

**Xinxin Xu, Zhongping Cui, Ji Qi, and Xiaoxia Liu\***

*Department of Chemistry, College of Science, Northeast University, Shenyang, Liaoning, 110819, People's Republic of China*

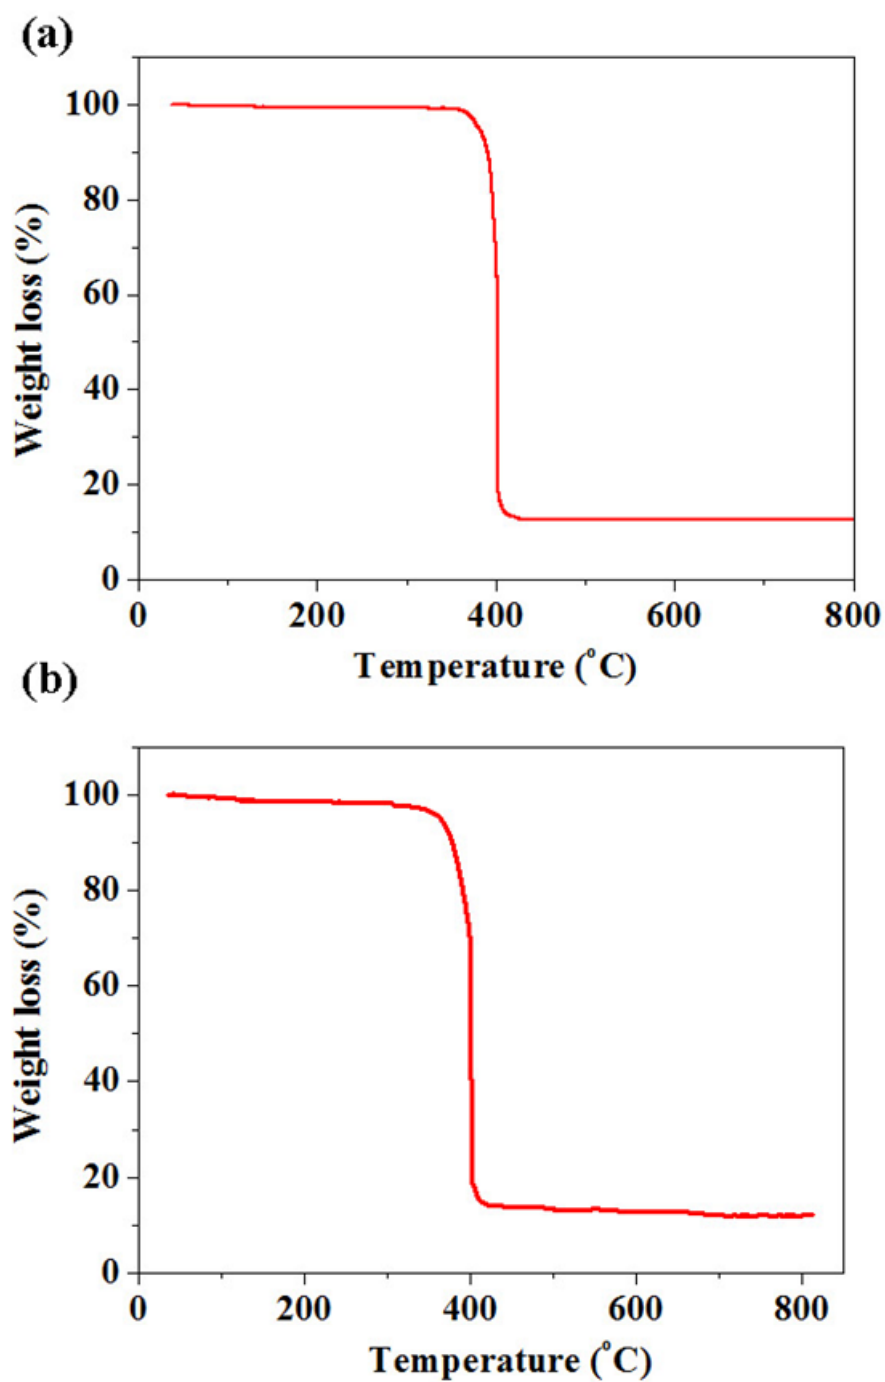

**Figure S1** (a) TGA curve of **CP1**; (b) TGA curve of **CP2**.

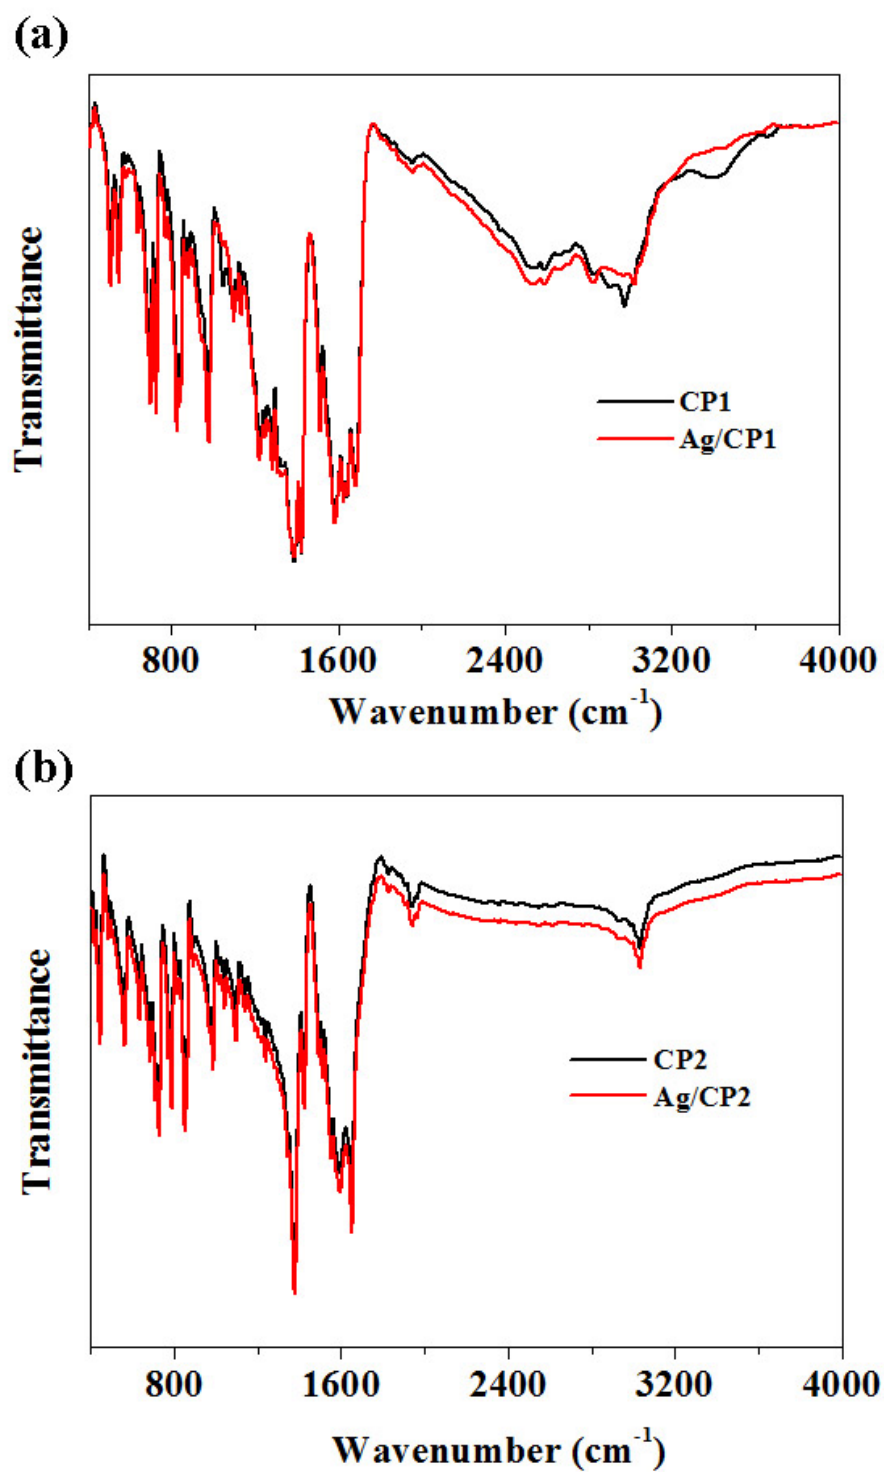

**Figure S2** (a) IR spectra of **CP1** and **Ag/CP1**; (b) IR spectra of **CP2** and **Ag/CP2**.

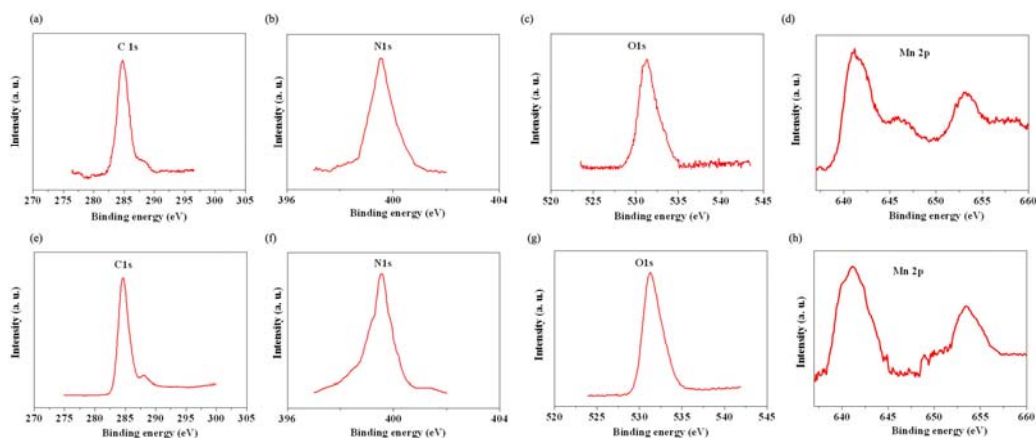

**Figure S3** XPS spectra (a) C1s of **Ag/CP1**, (b) N1s of **Ag/CP1**, (c) O1s of **Ag/CP1**,  
(d) Mn 2p of **Ag/CP1**, (e) C1s of **Ag/CP2**, (f) N1s of **Ag/CP2**, (g) O1s of **Ag/CP2**. (h)  
Mn 2p of **Ag/CP2**.

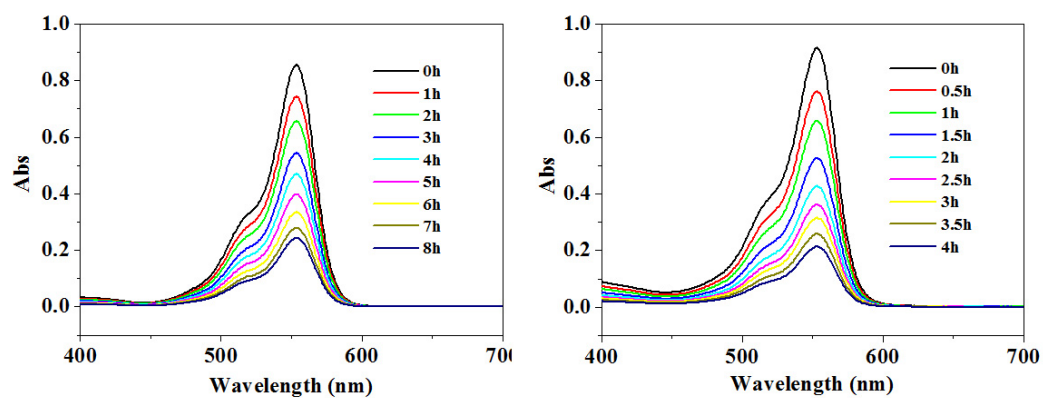

**Figure S4** Absorption spectra of RhB degraded by different photocatalysts: (a) Ag nanorods (visible light); (b) Ag nanorods (UV light)
